# Supplementary material
Source: HighWire-hosted journal article supplement (https://bmjopen.bmj.com/content/9/10/e031773)

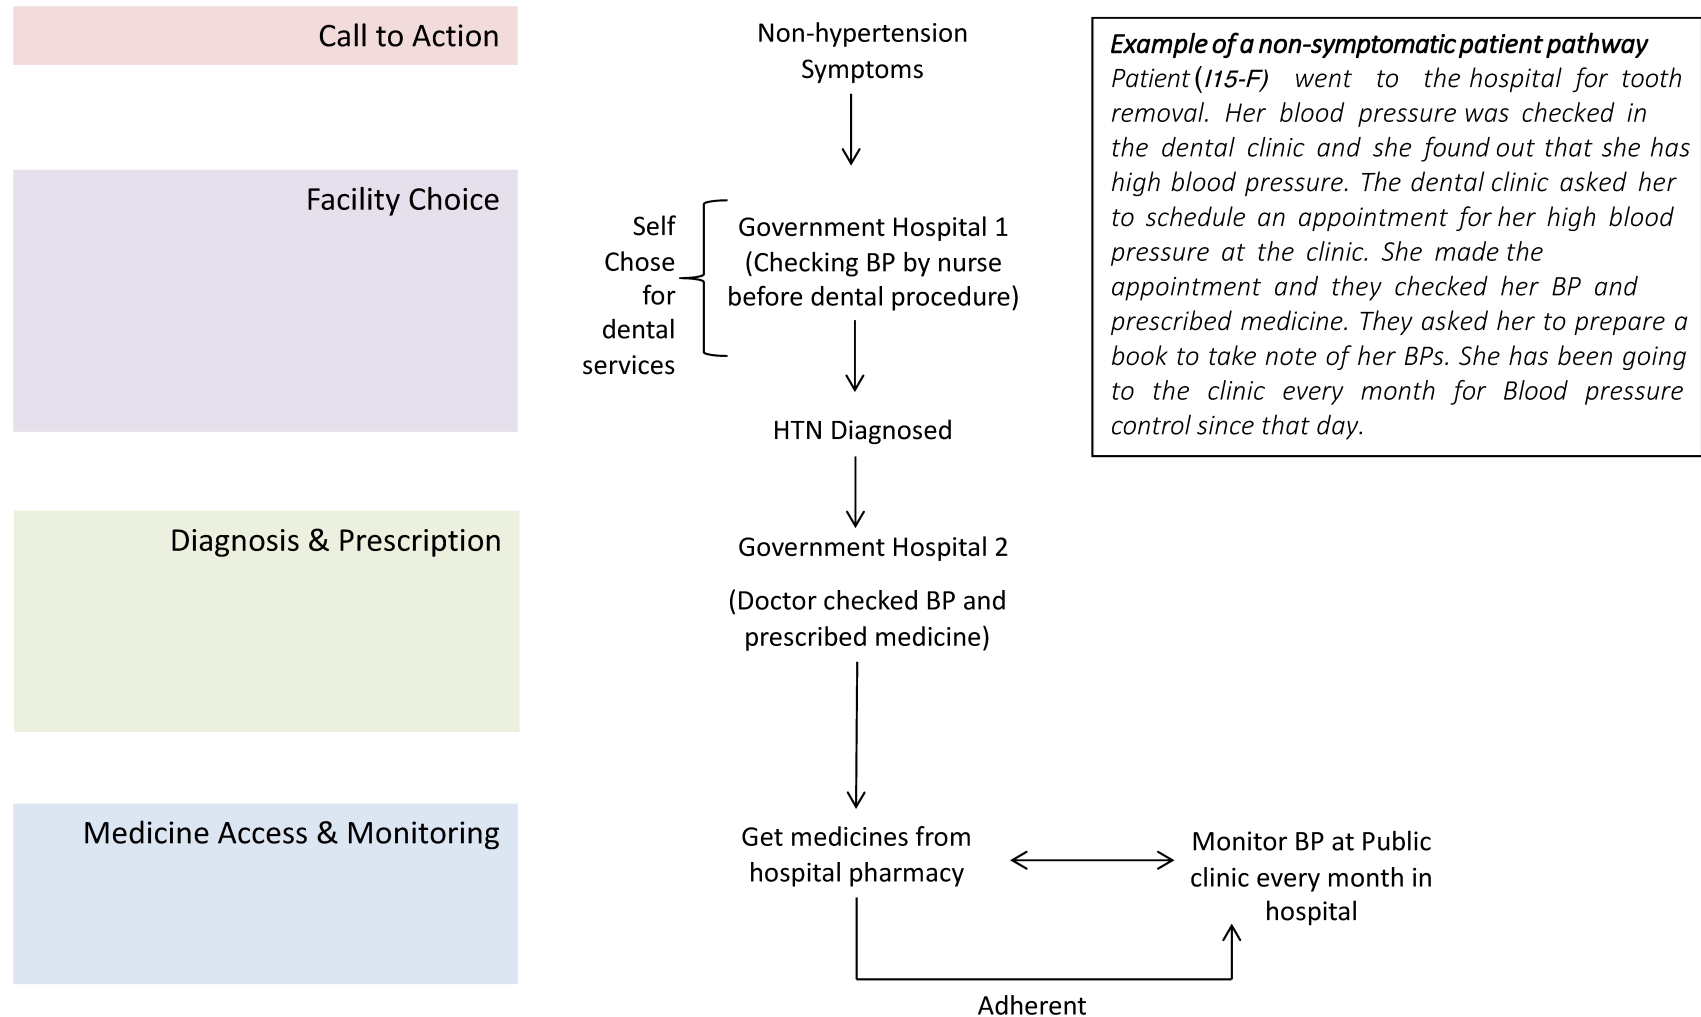

**Figure 2.** Patient pathway\_ non-hypertension symptoms

Supplement: inline-supplementary-material-1 [file inline-supplementary-material-1.pdf]
